# Supplementary material for: Evaluation of DNA Methylation Changes and Micronuclei in Workers Exposed to a Construction Environment
Source: PubMed Central journal article supplement (PMC6466300; doi:10.3390/ijerph16060902), 2019-03-13
Supplement: ijerph-16-00902-s001.pdf [file ijerph-16-00902-s001.pdf]

**Table S1.** Primer sequences and gene regions analyzed

| Gene          | Primers                                                                                                                                                 | T<br>(°C) | Amplicon<br>(bp) | Analyzed sequence                                       |
|---------------|---------------------------------------------------------------------------------------------------------------------------------------------------------|-----------|------------------|---------------------------------------------------------|
| <i>APC</i>    | Forward - TTTTGTGGTTGGGGATTG<br>Reverse Biot. - CTCCAACACCTACCCCATTT<br>Sequencing – GGGGTTTTGTGTTTTA<br>Chromosome Loc.: chr5:112073325-112073635      | 55        | 311              | TTGC/TGGAGTGC/TGGGTC<br>/TGGGAAGC/TGGAG                 |
| <i>MLH1</i>   | Forward - TTTAGGAGTGAAGGAGGT<br>Reverse Biot. - CCCTATACCTAATCTATC<br>Sequencing – GTTTTGAGTAGAGTTTTATTAGGGT<br>Chromosome Loc: chr3:37034287-37034459  | 51        | 173              | C/TGC/TGC/TGTTTC/TGTC/T<br>GTTC/TGTTATATATC/TGTT        |
| <i>LINE-1</i> | Forward Biot - TAGGGAGTGTTAGATAGTGG<br>Reverse - AACTCCCTAACCCCTTAC<br>Sequencing – CAAATAAAACAATACCTC                                                  | 58        | 120              | G/ACCCTACTTCG/AACTC<br>G/ACG/ACACG/AATAC                |
| <i>CDKN2A</i> | Forward - GAGGGGTTGGTTGGTTATTAGA<br>Reverse Biot - TACAAACCCTCTACCCACCTAAAT<br>Sequencing – TGGTTATTAGAGGGTG<br>Chromosome Loc.: chr9:21974659-21974920 | 65        | 262              | GGGC/TGGATC/TGC/TGTG<br>C/TGTTC/TGGC/TGGTTGC/<br>TGGAGA |

T: temperature

**Table S2.** Levels of trace elements in blood of the construction workers in comparison to the control group

| <b>Analytes</b> | <b>Control (N=47)</b>            |            |            | <b>Case (N=56)</b>               |            |            | <b>p-value</b> |
|-----------------|----------------------------------|------------|------------|----------------------------------|------------|------------|----------------|
|                 | <b>Mean (<math>\pm</math>SD)</b> | <b>Min</b> | <b>Max</b> | <b>Mean (<math>\pm</math>SD)</b> | <b>Min</b> | <b>Max</b> |                |
| Cu $\mu$ g/L    | 1516 (247)                       | 1019       | 2301       | 1274 (285)                       | 778        | 2684       | 0.001          |
| Zn $\mu$ g/L    | 10514 (2501)                     | 6145       | 16306      | 7884 (2050)                      | 5093       | 14013      | 0.001          |
| Cr $\mu$ g/L    | 0.50 (1.35)                      | 0.01       | 8.72       | 0.14 (0.37)                      | 0.01       | 2.21       | 0.001          |
| Vu $\mu$ g/L    | 0.26 (0.21)                      | 0.01       | 0.85       | 0.14 (0.09)                      | 0.01       | 0.57       | 0.002          |
| As $\mu$ g/L    | 10.40 (10.93)                    | 2.71       | 49.34      | 3.57 (1.15)                      | 2.05       | 7.97       | 0.001          |
| Pb $\mu$ g/L    | 0.17 (0.57)                      | 0.01       | 3.80       | 0.04 (0.12)                      | 0.01       | 0.7        | 0.002          |
| Cd $\mu$ g/L    | 0.17 (0.57)                      | 0.01       | 3.80       | 0.04 (0.12)                      | 0.01       | 0.7        | 0.002          |
| Se $\mu$ g/L    | 89.49 (26.80)                    | 60         | 173        | 64.13 (18.70)                    | 45.11      | 142        | 0.001          |
| Mn $\mu$ g/L    | 3.02 (3)                         | 0.01       | 10.70      | 0.81 (2.11)                      | 0.01       | 12.40      | 0.001          |
| Co $\mu$ g/L    | 0.19 (0.32)                      | 0.00       | 1.30       | 0.07 (0.22)                      | 0.00       | 1.57       | 0.001          |
| Ti $\mu$ g/L    | 0.10 (0.14)                      | 0.00       | 0.61       | 0.06 (0.12)                      | 0.00       | 0.92       | 0.661          |

Mann-Whitney test was used for statistical analyses

**Table S3.** Characterization of PAHs found in PM (PM2.5) at the construction site

| Polycyclic aromatic hydrocarbon<br>(PAHs) | Sampling periods |             |              |
|-------------------------------------------|------------------|-------------|--------------|
|                                           | Sampling I       | Sampling II | Sampling III |
| Acenaphthylene                            | 0.05             | 0.08        | 0.03         |
| Acenaphthene                              | 0.23             | 0.62        | 0.03         |
| Fluorene                                  | 0.08             | 0.24        | 0.03         |
| Phenanthrene                              | 0.25             | 0.51        | 0.1          |
| Anthracene                                | 0.06             | 0.18        | 0.03         |
| Fluoranthene                              | 0.13             | 0.28        | 0.07         |
| Pyrene                                    | 0.19             | 0.33        | 0.1          |
| Benzo[a]anthracene                        | 0.04             | 0.11        | 0.04         |
| Chrysene                                  | 0.06             | 0.12        | 0.04         |
| Benzo[b]fluoranthene                      | 0.05             | 0.08        | 0.05         |
| Benzo[k]fluoranthene                      | 0.02             | 0.04        | 0.03         |
| Benzo[a]pyrene                            | 0.05             | 0.06        | 0.04         |
| Indeno[1,2,3-cd]pyrene                    | 0.05             | 0.03        | 0.03         |
| DBA                                       | 0.01             | 0.01        | 0.01         |
| Benzoperylene                             | 0.13             | 0.11        | 0.06         |
| Coronene                                  | 0.03             | 0.01        | 0.02         |
| Nitro-PAH                                 |                  |             |              |
| 1-Nitronaphthalene                        | 0.23             | -           | -            |
| 1-Methyl-4-nitronaphthalene               | -                | -           | -            |
| 2-Nitronaphthalene                        | 0.11             | -           | -            |

|                             |      |      |      |
|-----------------------------|------|------|------|
| 2-Nitrobiphenyl             | -    | -    | -    |
| 1-Methyl-5-nitronaphthalene | -    | 0.16 | -    |
| 1-Methyl-6-nitronaphthalene | -    | 0.17 | -    |
| 2-Methyl-4-nitronaphthalene | -    | -    | -    |
| 3-Nitrobiphenyl             | -    | -    | -    |
| 4-Nitrobiphenyl             | -    | -    | -    |
| 5-Nitroacenaphthene         | -    | -    | -    |
| 2-Nitrofluorene             | -    | -    | 0.38 |
| 2-Nitrophenanthrene         | -    | -    | 0.14 |
| 3-Nitrophenanthrene         | -    | -    | -    |
| 9-Nitrophenanthrene         | -    | -    | -    |
| 2-Nitroanthracene           | -    | -    | -    |
| 9-Nitroanthracene           | -    | -    | -    |
| 2-Nitrofluoranthene         | -    | -    | -    |
| 3-Nitrofluoranthene         | -    | -    | -    |
| 1-Nitropyrene               | 0.87 | 0.38 | 0.25 |
| 2-Nitropyrene               | -    | -    | -    |
| 4-Nitropyrene               | -    | -    | -    |
| 7-Nitrobenzo[a]anthracene   | 0.55 | 0.64 | 0.47 |
| 6-Nitrocrisene              | -    | -    | -    |
| 3-Nitrobenzanthrone         | -    | -    | -    |
| 6-Nitrobenzo[a]pyrene       | 1.07 | 1.27 | 0.65 |
| 1-Nitrobenzo[e]pyrene       | -    | -    | -    |

|                         |   |      |      |
|-------------------------|---|------|------|
| 3-Nitrobenzo[e]pyrene   | - | -    | -    |
| Benzoquinone            | - | -    | -    |
| 1,4 -Naphthoquinone     | - | -    | -    |
| 1,2 -Naphthoquinone     | - | -    | -    |
| 9,10 - Anthraquinone    | - | 0.12 | 0.05 |
| 9,10 -Phenanthraquinone | - | -    | -    |

**Table S4.** Methylation level of the *MLH1* gene and the repetitive sequence *LINE-1*, analyzed with regard to exposure to occupational agents in the actual work environment.

| Gene/occupational agent |     | Exposed workers |             |                       | <i>p</i> value |
|-------------------------|-----|-----------------|-------------|-----------------------|----------------|
|                         |     | N <sup>a</sup>  | Mean ± SD   | Median (IQR)          |                |
| <b><i>MLH1</i></b>      |     |                 |             |                       |                |
| Sand                    | Yes | 15              | 3.62 ± 1.40 | 3.71 (0 - 5.55)       | 0.49           |
|                         | No  | 40              | 3.96 ± 1.52 | 4.13 (0 - 8.47)       |                |
| Concrete                | Yes | 10              | 3.87 ± 0.89 | 3.90 (2.70 - 4.94)    | 0.80           |
|                         | No  | 46              | 3.86 ± 1.58 | 3.95 (0 - 8.47)       |                |
| Wood                    | Yes | 32              | 3.54 ± 1.70 | 3.38 (0 - 8.47)       | 0.02*          |
|                         | No  | 23              | 4.35 ± 0.97 | 4.43 (2.22 - 6.16)    |                |
| Silica                  | Yes | 36              | 3.85 ± 1.65 | 4.03 (0 - 8.47)       | 0.86           |
|                         | No  | 20              | 3.90 ± 1.14 | 3.66 (2.22 - 6.16)    |                |
| Ultraviolet             | Yes | 7               | 3.31 ± 1.72 | 3.36 (0 - 5.28)       | 0.42           |
|                         | No  | 49              | 3.94 ± 1.44 | 4.01 (0 - 8.47)       |                |
| <b><i>LINE-1</i></b>    |     |                 |             |                       |                |
| Sand                    | Yes | 16              | 67.27(2.01) | 66.51 (65.03 - 70.53) | 0.15           |
|                         | No  | 40              | 66.68(2.47) | 65.68 (62.48 - 72.48) |                |
| Concrete                | Yes | 10              | 67.22(2.30) | 66.36 (65.15 - 70.61) | 0.38           |

|             |     |    |             |                       |       |
|-------------|-----|----|-------------|-----------------------|-------|
|             | No  | 47 | 66.75(2.35) | 65.86 (62.48 - 72.48) |       |
| Wood        | Yes | 33 | 67.34(2.60) | 66.43 (62.48 - 72.48) | 0.15  |
|             | No  | 23 | 66.19(1.75) | 65.72 (63.70 - 70.62) |       |
| Silica      | Yes | 37 | 67.21(2.35) | 66.49 (62.48 - 72.48) | 0.05* |
|             | No  | 20 | 66.14(2.19) | 65.54 (62.79 - 70.49) |       |
| Ultraviolet | Yes | 8  | 66.68(2.07) | 65.56 (65.03 - 70.26) | 0.81  |
|             | No  | 49 | 66.86(2.39) | 66.00 (62.48 - 72.48) |       |

---

\* Statistically significant

<sup>a</sup> Mann-Whitney tests
